# Supplementary material for: Cyanide-bridged heterobimetallic magnetic complexes based on metalloporphyrinate and tricyanometalate building blocks
Source: Royal Society of Chemistry journal article supplement (doi:10.1039/c5nj02132d), 2015-10-30
Supplement: c5nj02132d1.pdf [file c5nj02132d1.pdf]

Electronic Supplementary Information

**Cyanide-bridged Heterobimetallic Magnetic Complexes Based on  
Metalloporphyrinate and Tricyanometalate Building Blocks**

Feng Gao,<sup>\*a</sup> Guang-Zhou Zhu,<sup>a</sup> Liu Yang,<sup>a</sup> and Min-Xia Yao<sup>\*b</sup>

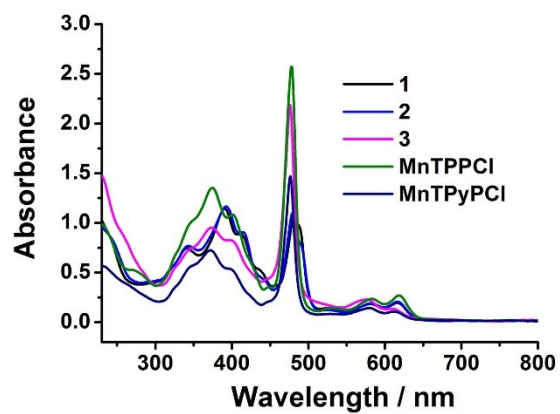

**Fig. S1** UV-Vis absorption spectra for all compounds in  $\text{CH}_2\text{Cl}_2$  ( $5 \times 10^{-5}$  M).

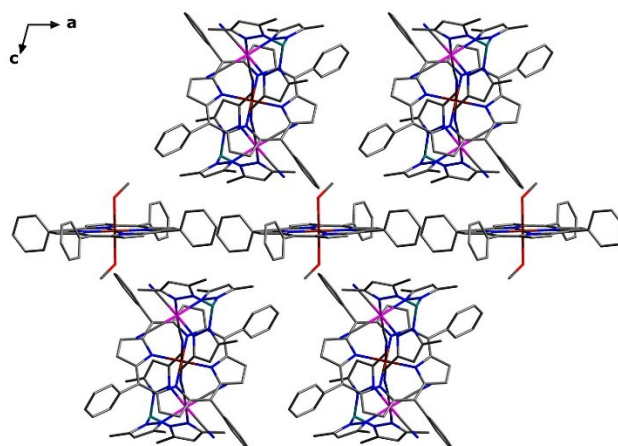

**Fig. S2** Crystal packing of complex **1** with hydrogen atoms omitted for clarity.

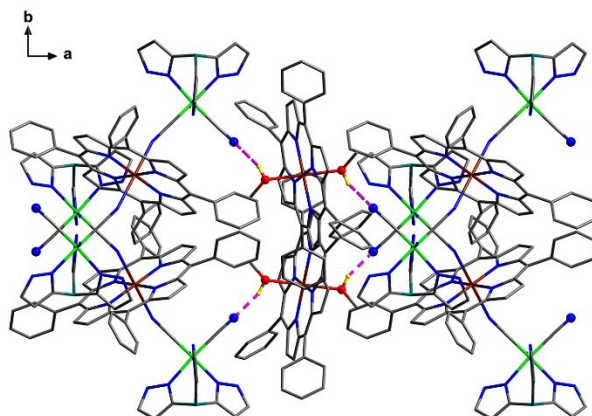

**Fig. S3** Crystal packing of complex **2** with hydrogen atoms omitted for clarity. The dotted purple lines represent the hydrogen-bonds.

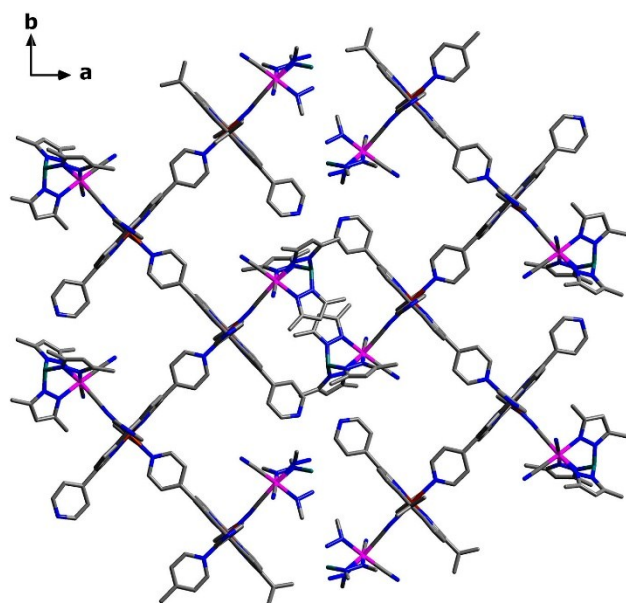

**Fig. S4** Crystal packing of complex **3** with hydrogen atoms omitted for clarity.

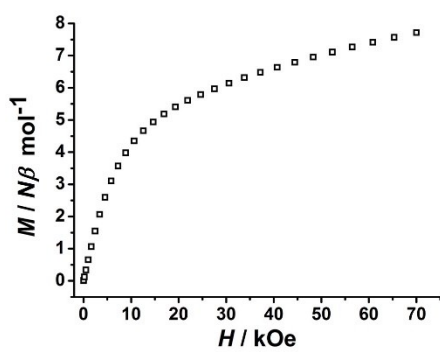

**Fig. S5** Field-dependent magnetization for **1** at 1.8 K.

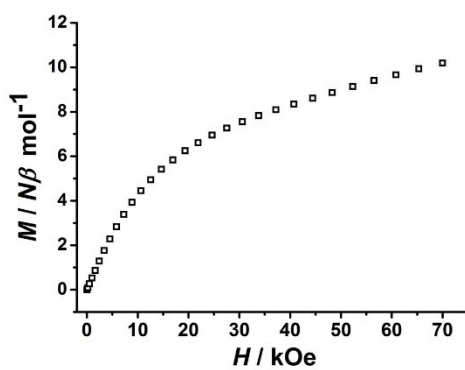

**Fig. S6** Field-dependent magnetization for **2** at 1.8 K.

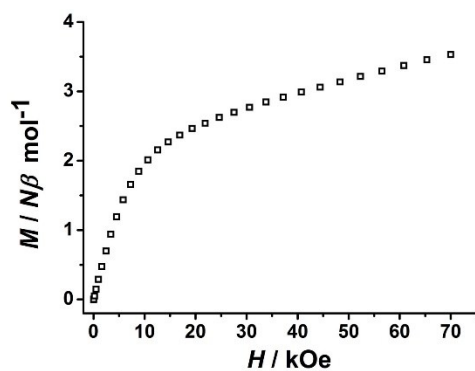

**Fig. S7** Field-dependent magnetization for **3** at 1.8 K.

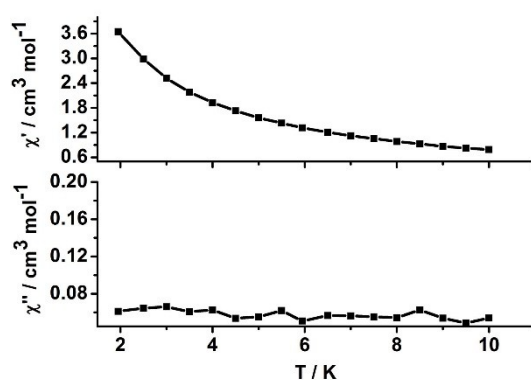

**Fig. S8** Temperature-dependent in-phase ( $\chi'$ ) and out-of-phase ( $\chi''$ ) ac susceptibilities for complex **1** under zero static field in the frequency of 997 Hz. The solid lines are guides only.

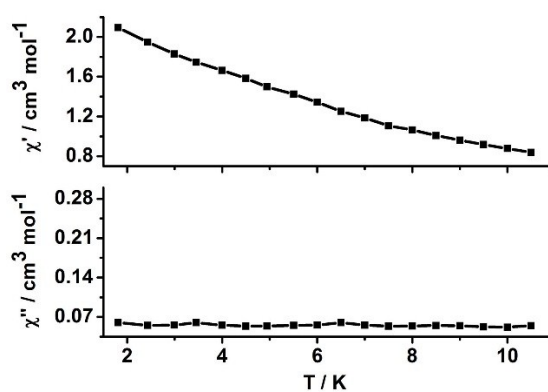

**Fig. S9** Temperature-dependent in-phase ( $\chi'$ ) and out-of-phase ( $\chi''$ ) ac susceptibilities for complex **2** under zero static field in the frequency of 997 Hz. The solid lines are guides only.

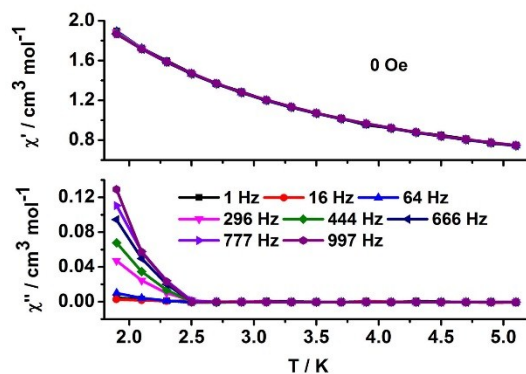

**Fig. S10** Temperature-dependent in-phase ( $\chi'$ ) and out-of-phase ( $\chi''$ ) ac susceptibilities for complex **3** under zero static field at 1–997 Hz. The solid lines are guides only.

**Table S1.** Selected bond lengths (Å) and angles (°) for complex **1**.

|             |          |                   |           |
|-------------|----------|-------------------|-----------|
| Fe(1)-N(4)  | 2.009(3) | Mn(2)-N(13)       | 2.008(3)  |
| Fe(1)-N(6)  | 1.997(3) | N(10)-C(39)-Fe(1) | 174.9(3)  |
| Fe(1)-N(8)  | 2.003(3) | C(39)-N(10)-Mn(1) | 168.8(3)  |
| Fe(1)-C(39) | 1.912(3) | N(1)-Mn(1)-N(2)   | 89.84(10) |
| C(39)-N(10) | 1.148(4) | N(1)-Mn(1)-N(10)  | 88.00(10) |
| Mn(1)-N(1)  | 2.017(2) | N(2)-Mn(1)-N(10)  | 86.27(10) |
| Mn(1)-N(2)  | 2.016(2) | N(12)-Mn(2)-O(1)  | 87.78(10) |
| Mn(1)-N(10) | 2.219(3) | N(13)-Mn(2)-O(1)  | 88.57(10) |
| Mn(2)-O(1)  | 2.220(2) | N(12)-Mn(2)-N(13) | 89.62(10) |
| Mn(2)-N(12) | 2.019(3) |                   |           |

**Table S2.** Selected bond lengths (Å) and angles (°) for complex **2**.

|             |          |                   |           |
|-------------|----------|-------------------|-----------|
| Cr(1)-N(1)  | 2.043(3) | Mn(2)-N(13)       | 2.013(3)  |
| Cr(1)-N(3)  | 2.056(3) | N(7)-C(54)-Cr(1)  | 174.0(3)  |
| Cr(1)-N(6)  | 2.056(3) | C(54)-N(7)-Mn(1)  | 160.5(3)  |
| C(54)-N(7)  | 1.151(5) | N(10)-Mn(1)-N(11) | 89.63(10) |
| Cr(1)-C(54) | 2.066(4) | N(7)-Mn(1)-N(10)  | 89.93(11) |
| Mn(1)-N(7)  | 2.315(3) | N(7)-Mn(1)-N(11)  | 87.28(11) |
| Mn(1)-N(10) | 2.018(3) | N(12)-Mn(2)-O(1)  | 87.44(10) |
| Mn(1)-N(11) | 2.005(3) | N(13)-Mn(2)-O(1)  | 87.53(10) |
| Mn(2)-O(1)  | 2.241(2) | N(12)-Mn(2)-N(13) | 89.64(11) |
| Mn(2)-N(12) | 2.002(3) |                   |           |

**Table S3.** Selected bond lengths (Å) and angles (°) for complex **3**.

|              |          |                    |          |
|--------------|----------|--------------------|----------|
| Fe(1)-N(10)  | 1.984(7) | N(17)-C(58)-Fe(1)  | 176.4(8) |
| Fe(1)-N(12)  | 1.980(7) | C(58)-N(17)-Mn(1)  | 164.4(7) |
| Fe(1)-N(14)  | 2.000(7) | N(5)-Mn(1)-N(6)    | 90.1(2)  |
| Fe(1)-C(58)  | 1.907(8) | N(6)-Mn(1)-N(7)    | 89.6(2)  |
| C(58)-N(17)  | 1.156(9) | N(7)-Mn(1)-N(8)    | 90.6(2)  |
| Mn(1)-N(5)   | 2.003(6) | N(5)-Mn(1)-N(8)    | 89.7(2)  |
| Mn(1)-N(6)   | 2.019(6) | N(17)-Mn(1)-N(5)   | 94.2(2)  |
| Mn(1)-N(7)   | 2.005(6) | N(17)-Mn(1)-N(7)   | 87.0(2)  |
| Mn(1)-N(8)   | 2.014(6) | N(3)#1-Mn(1)-N(5)  | 89.6(2)  |
| Mn(1)-N(17)  | 2.212(6) | N(3)#1-Mn(1)-N(7)  | 89.2(2)  |
| Mn(1)-N(3)#1 | 2.373(6) | N(17)-Mn(1)-N(3)#1 | 175.2(2) |

Symmetry code for **3**: #1 -x, y+1/2, -z+1/2.
